# Supplementary material for: mRNA stem-loops can pause the ribosome by hindering A-site tRNA binding
Source: eLife journal article supplement (doi:10.7554/elife.55799), 2020-05-19
Supplement: supp [file elife-55799-supp-v1.zip]

Archive with 9 entries (9 files):
- elife_poa_e55799_Transparent_Reporting_File.pdf
- elife_poa_e55799_Supplementary_file_1.docx
- elife_poa_e55799_Figure_1_figure_supplement_1.ai
- elife_poa_e55799_Figure_2_figure_supplement_1.ai
- elife_poa_e55799_Figure_5_figure_supplement_1.ai
- elife_poa_e55799_Figure_5_figure_supplement_2.ai
- elife_poa_e55799_Figure_6_figure_supplement_1.ai
- elife_poa_e55799_Figure_8_figure_supplement_1.pdf
- elife_poa_e55799_Figure_8_figure_supplement_2.tif
