# Supplementary figures and images for: mRNA stem-loops can pause the ribosome by hindering A-site tRNA binding
Source: eLife journal article supplement (doi:10.7554/elife.55799), 2020-05-19

**A**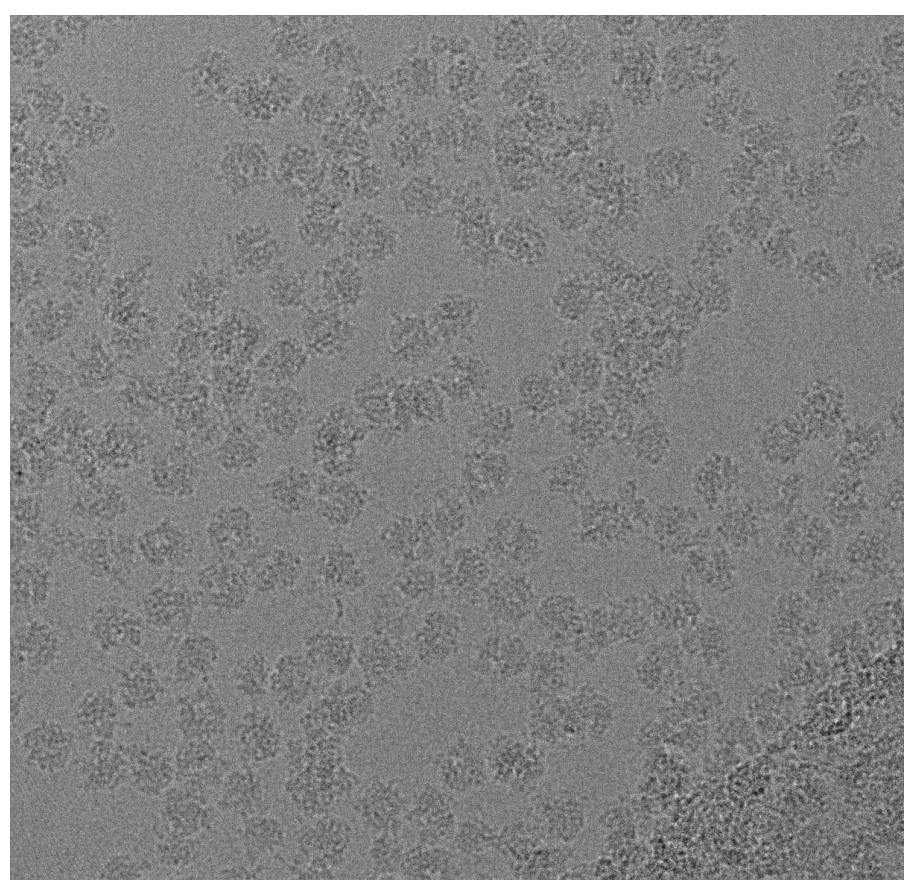**B**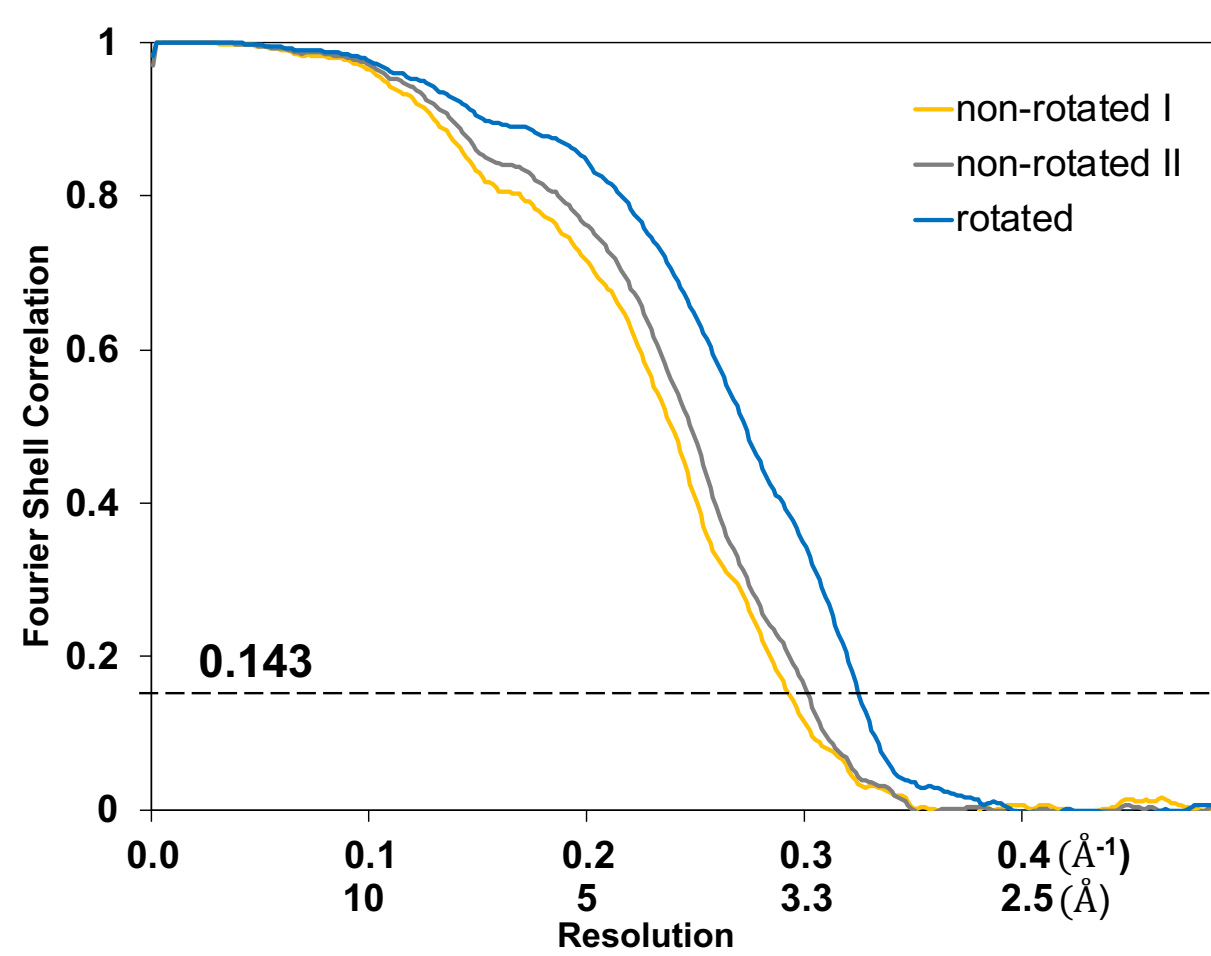**C** 640'261 particles selected for 3D classification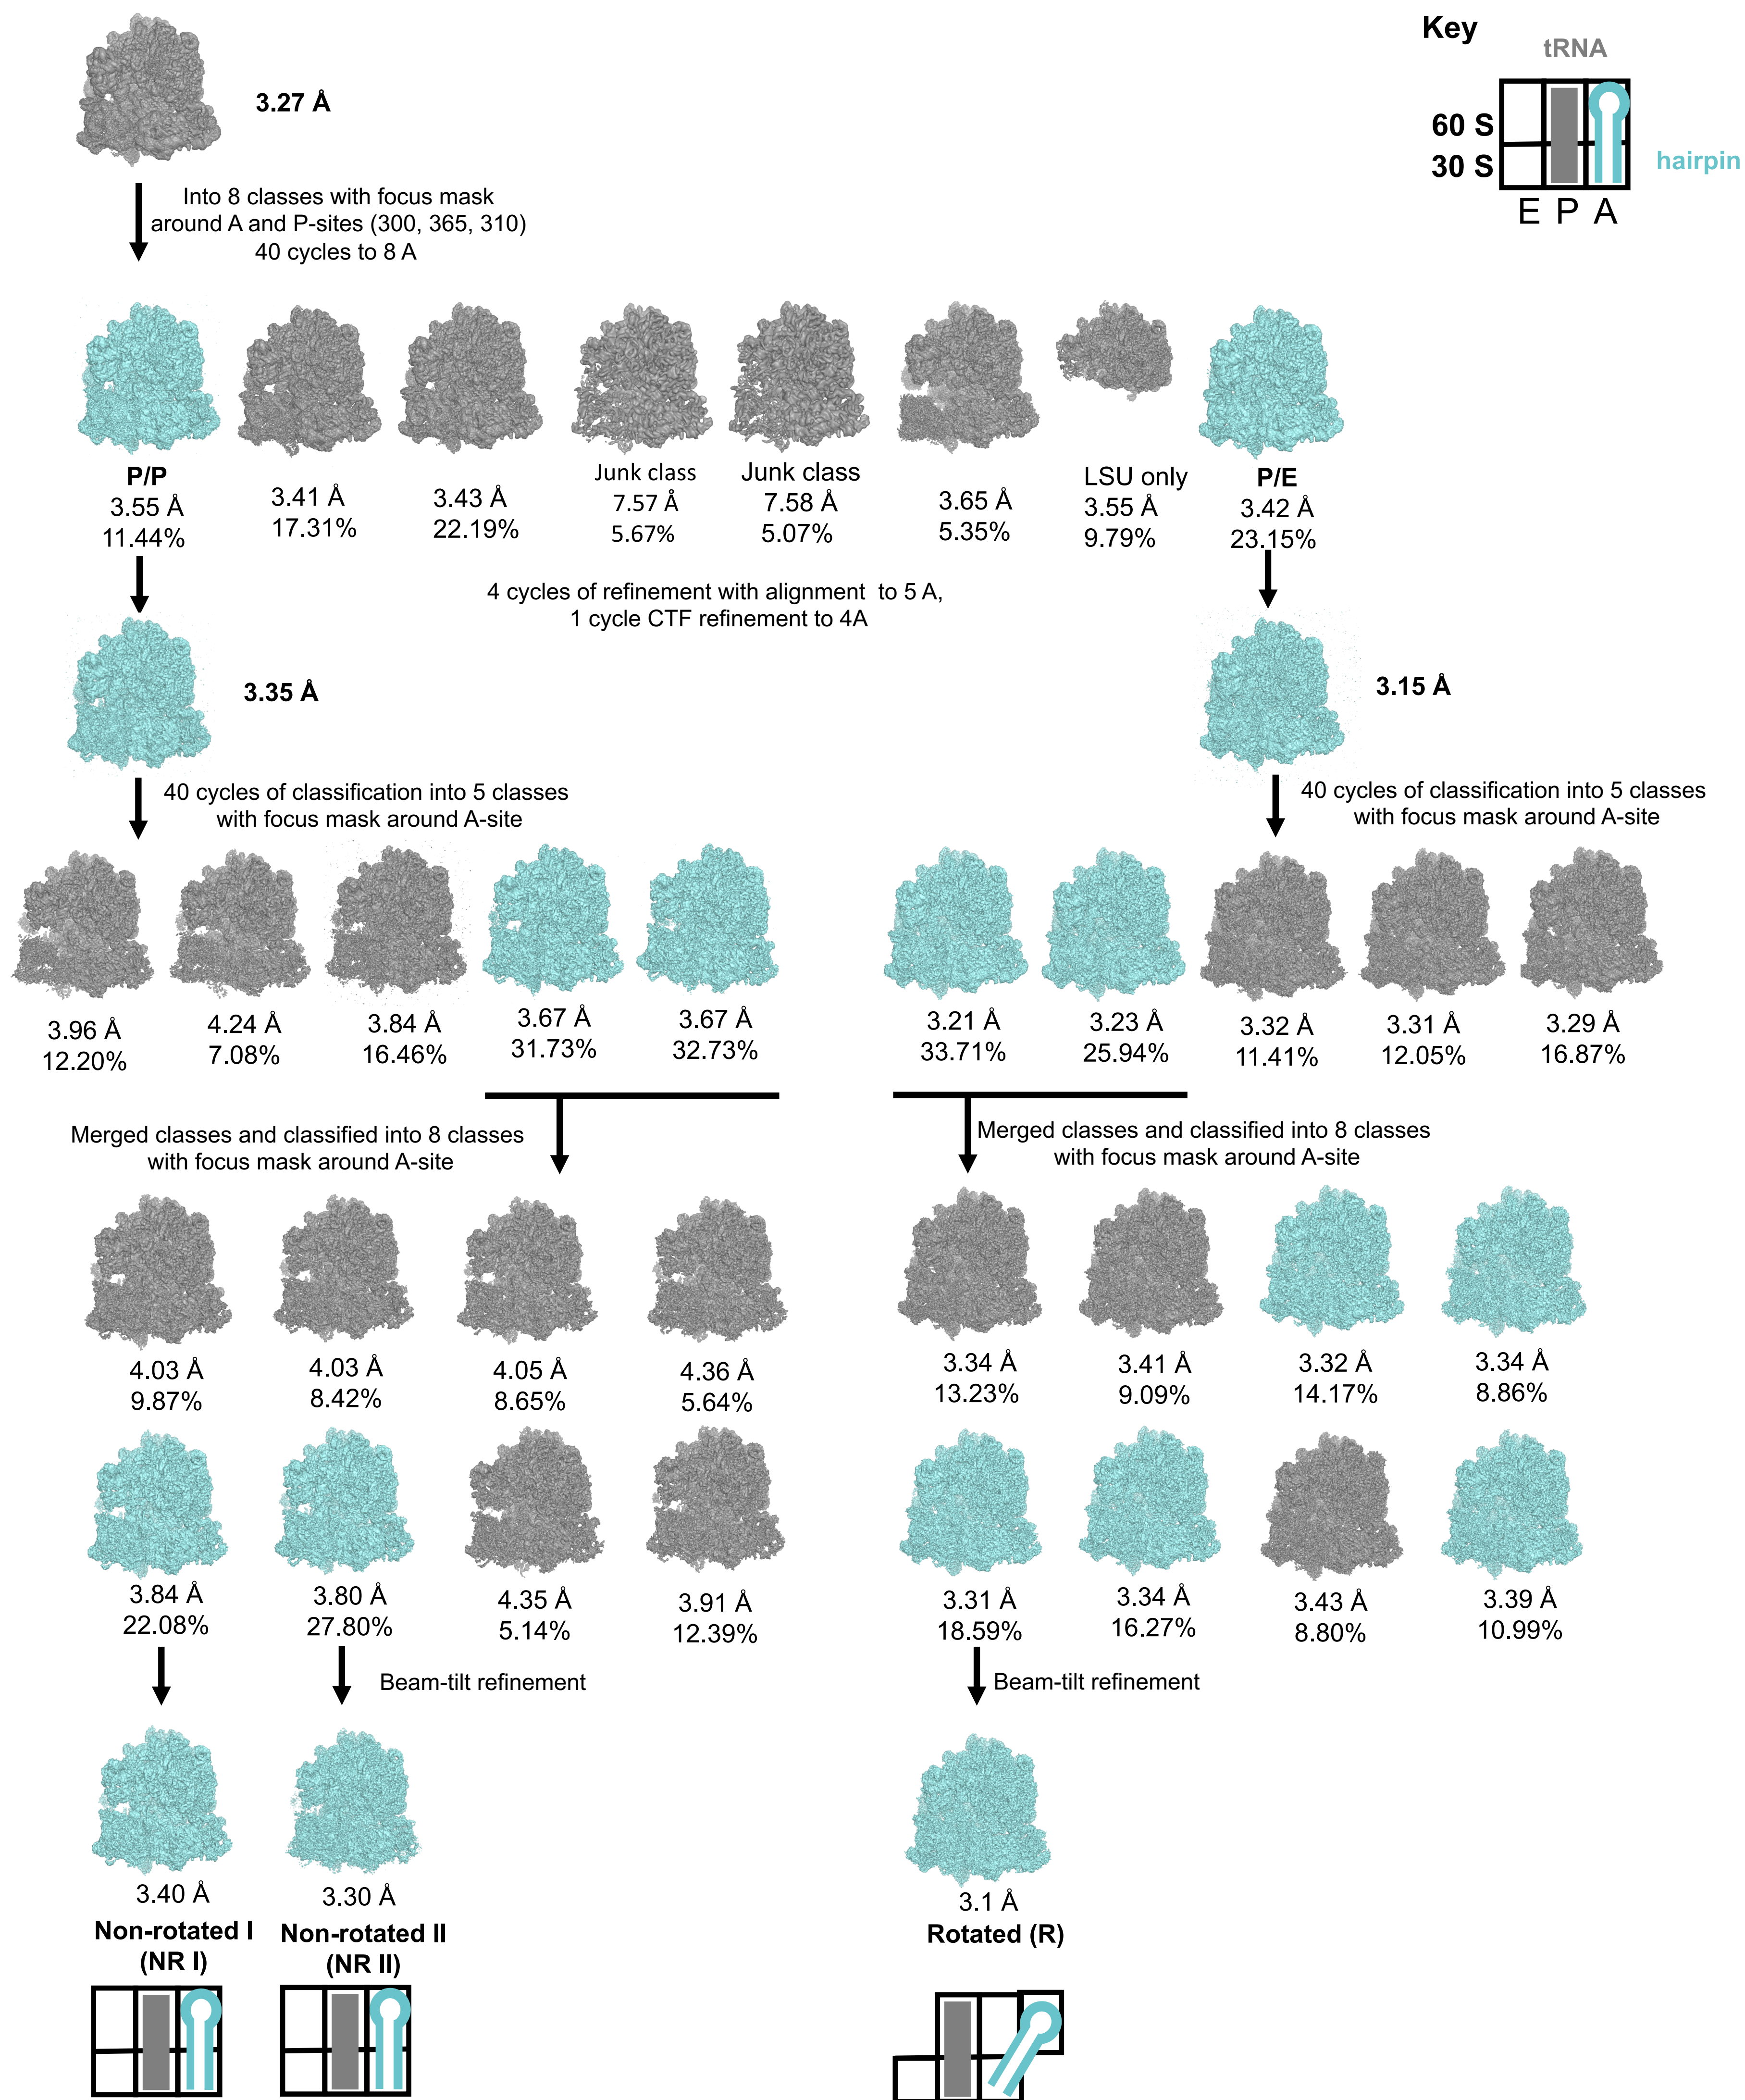

Supplement: supp [file elife-55799-supp-v1.zip › elife_poa_e55799_Figure_8_figure_supplement_1.pdf]

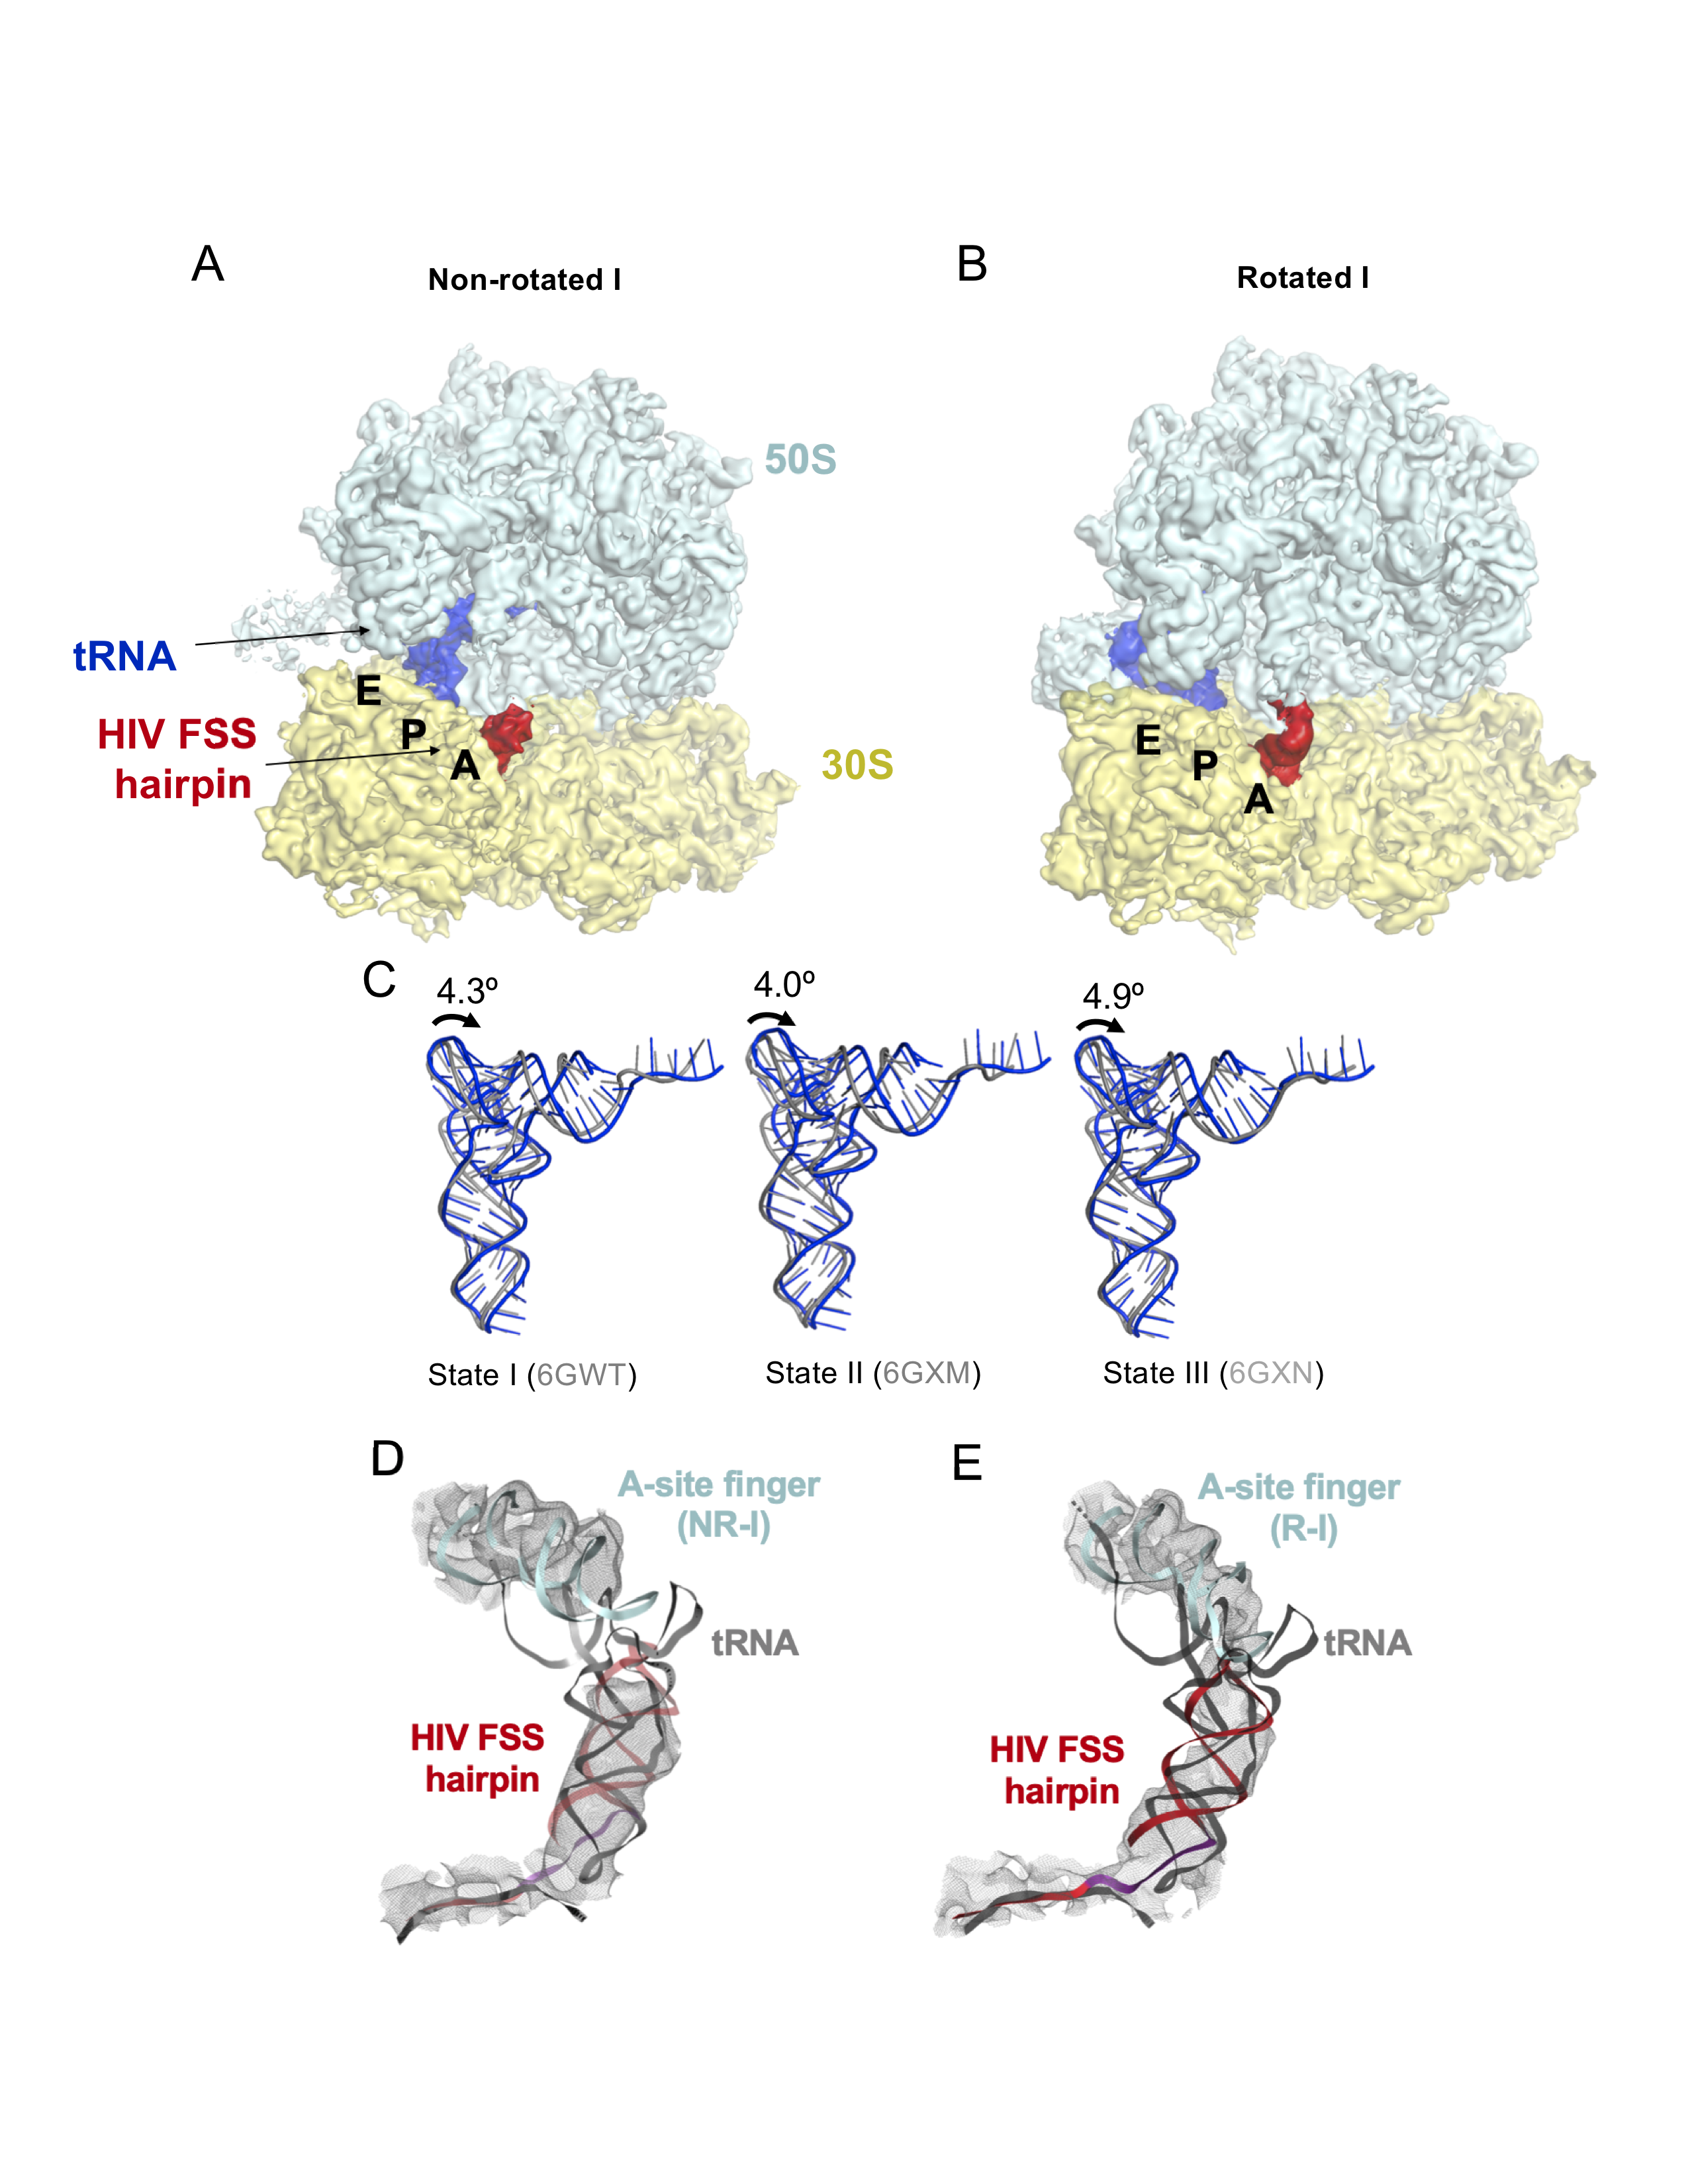

Supplement: supp [file elife-55799-supp-v1.zip › elife_poa_e55799_Figure_8_figure_supplement_2.tif]
